# Supplementary material for: Basic Guide to Multilayer Microfluidic Fabrication with Polyimide Tape and Diode Laser
Source: MDPI journal article supplement (doi:10.3390/mi14020324), 2023-01-27
Supplement: s1 [file s1]

# Basic guide to multilayer microfluidic fabrication with polyimide tape and diode laser

## Supplementary Information

Thana Thaweekulchai \* and Albert Schulte

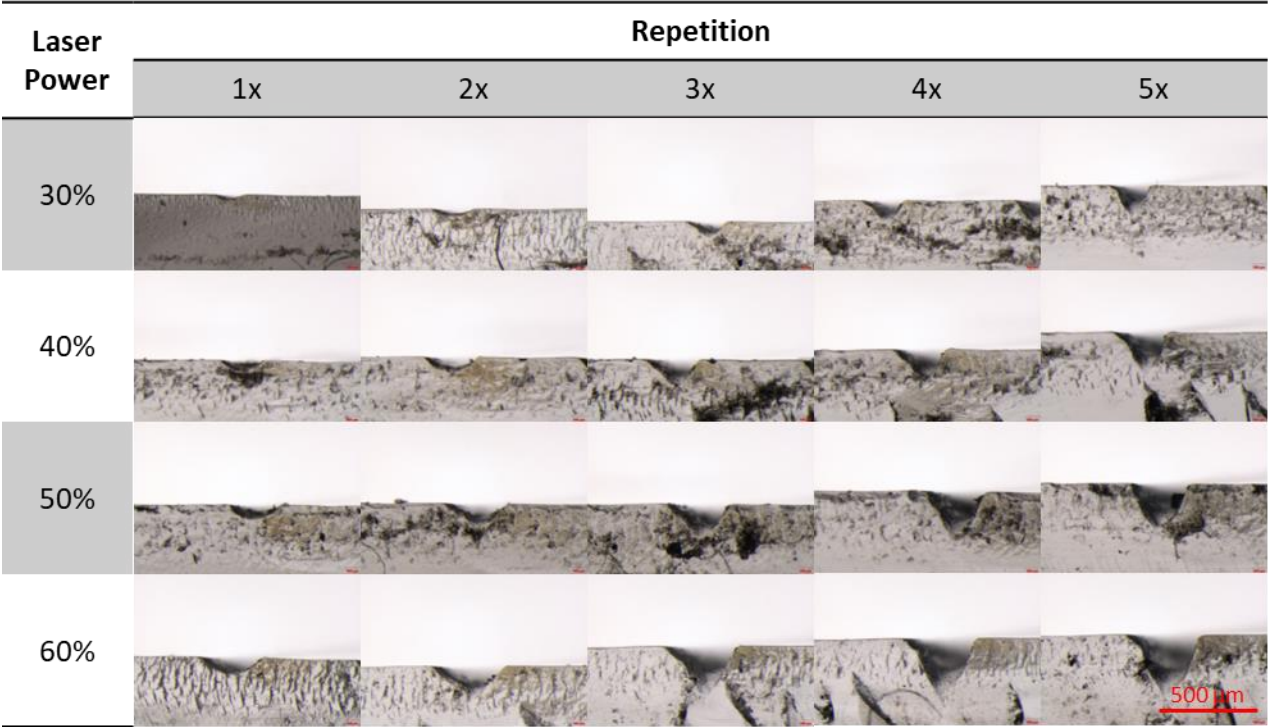

**SI Figure S1.** Photographs of cross-sectional profiles of microchannels fabricated with Raster single-line mode.

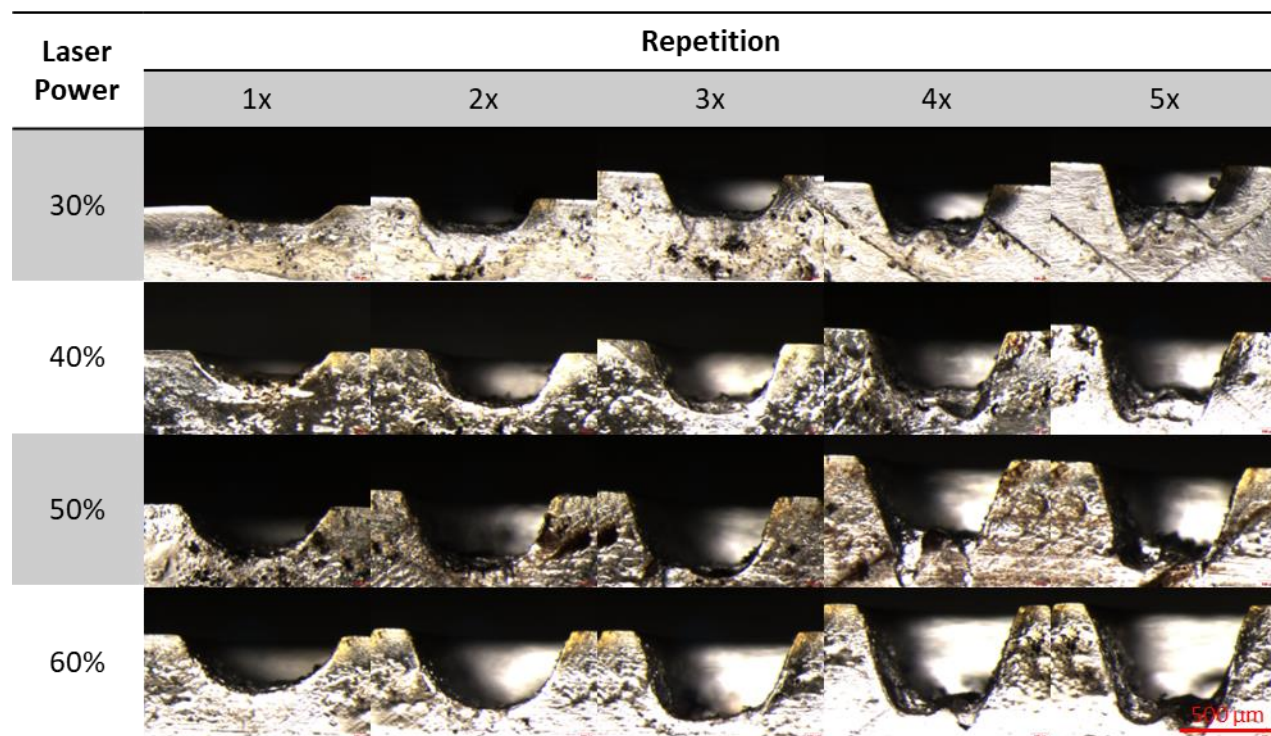

**SI Figure S2.** Photographs of cross-sectional profiles of microchannels fabricated with Raster 0.5mm mode.

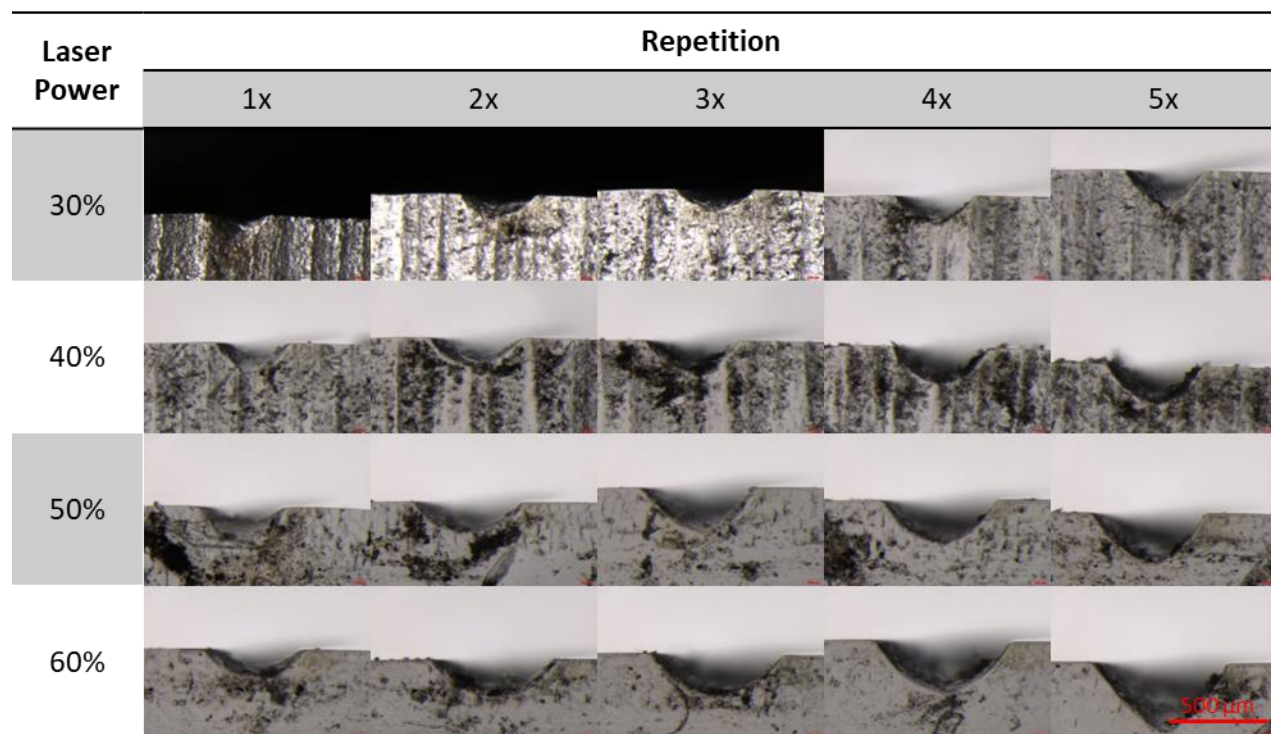

**SI Figure S3.** Photographs of cross-sectional profiles of microchannels fabricated with Vector single-line mode.

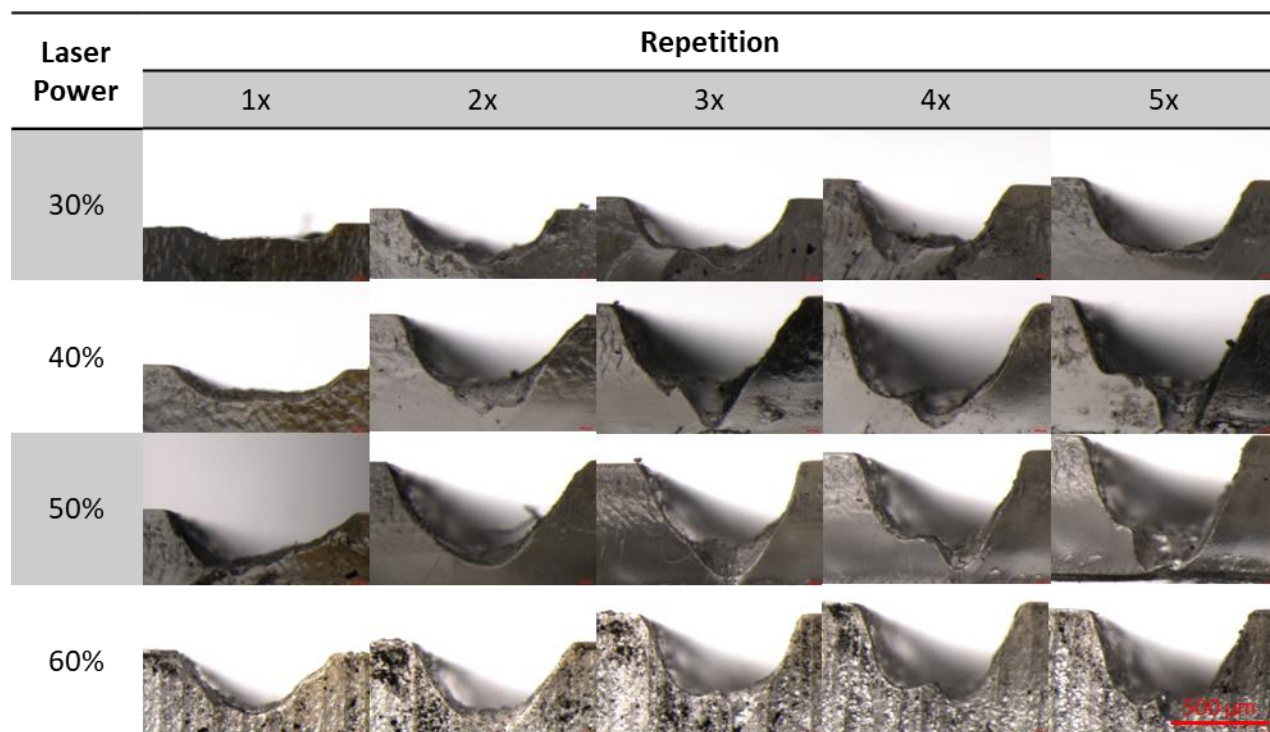

**SI Figure S4.** Photographs of cross-sectional profiles of microchannels fabricated with Vector 0.5mm mode.

**SI Table S1.** Abbreviations used.

|            |                                                 |
|------------|-------------------------------------------------|
| POC        | Point-of-care                                   |
| SCF        | Spontaneous capillary flow                      |
| SARS-CoV-2 | Severe acute respiratory syndrome-coronavirus-2 |
| CNC        | Computer numerical control                      |
| PMMA       | Polymethyl methacrylate                         |
| CAD        | Computer-aided design                           |
| IPA        | Isopropyl alcohol                               |
